# Supplementary material for: Changes in the Aromatic Compounds Content in the Muscat Wines as a Result of the Application of Ultrasound during Pre-Fermentative Maceration
Source: MDPI journal article supplement (doi:10.3390/foods10071462), 2021-06-24
Supplement: s1 [file s1]

**Table S1.** Percentage recovery and standar desviation (SD) for the different compounds analysed by SPE-GC-MS.

| Compound            | Recovery (%) | SD   |
|---------------------|--------------|------|
| Linalool            | 89           | 1.32 |
| $\alpha$ -terpineol | 93           | 0.49 |
| Nerol               | 98           | 5.12 |
| Geraniol            | 89           | 5.10 |
| Citronellol         | 98           | 0.78 |
| Isoamyl alcohol     | 102          | 8.99 |
| Ethyl hexanoate     | 129          | 3.89 |
| Hexan-1-ol          | 113          | 5.02 |
| Ethyl octanoate     | 121          | 9.30 |

**Table S2** Odor threshold ( $\mu\text{g L}^{-1}$ ) for the differents volatile compounds analysed.

| Compound            | Odor threshold | Reference |
|---------------------|----------------|-----------|
| Linalool            | 25             | [1,2]     |
| $\alpha$ -terpineol | 250            | [3,4]     |
| Nerol               | 400            | [5]       |
| Geraniol            | 30             | [6,7]     |
| Citronellol         | 100            | [7,8]     |
| Isoamyl alcohol     | 30,000         | [9,10]    |
| Ethyl hexanoate     | 5              | [2,8]     |
| Hexan-1-ol          | 1100           | [1]       |
| Ethyl octanoate     | 580            | [11]      |

## References

1. Castro Vázquez, L.; Pérez-Coello, M.S.; Cabezudo, M.D. Effects of enzyme treatment and skin extraction on varietal volatiles in Spanish wines made from Chardonnay, Muscat, Airén, and Macabeo grapes. *Anal. Chim. Acta* **2002**, *458*, 39–44, doi:10.1016/S0003-2670(01)01521-5.
2. Selli, S. Aroma components of cv . Muscat of Bornova wines and influence of skin contact treatment. *Food Chem.* **2006**, *94*, 319–326, doi:10.1016/j.foodchem.2004.11.019.
3. Zalacain, A.; Marín, J.; Alonso, G.L.; Salinas, M.R. Analysis of wine primary aroma compounds by stir bar sorptive extraction. *Talanta* **2007**, *71*, 1610–1615, doi:10.1016/j.talanta.2006.07.051.
4. Gómez-Míguez, M.J.; Gómez-Míguez, M.; Vicario, I.M.; Heredia, F.J. Assessment of colour and aroma in white wines vinifications: Effects of grape maturity and soil type. *J. Food Eng.* **2007**, *79*, 758–764, doi:10.1016/j.jfoodeng.2006.02.038.
5. González Álvarez, M.; González-Barreiro, C.; Cancho-Grande, B.; Simal-Gándara, J. Relationships between Godello white wine sensory properties and its aromatic fingerprinting obtained by GC-MS. *Food Chem.* **2011**, *129*, 890–898, doi:10.1016/j.foodchem.2011.05.040.
6. Palomo, E.S.; Díaz-maroto, M.C.; Viñas, M.A.G.; Soriano-pérez, A.; Pérez-coello, M.S. Aroma profile of wines from Albillo and Muscat grape varieties at different stages of ripening. *Food Control* **2007**, *18*, 398–403, doi:10.1016/j.foodcont.2005.11.006.
7. Caro, del; Fanara, C.; Genovese, A.; Moio, L.; Piga, A.; Piombino, P. Free and enzymatically hydrolysed volatile compounds of sweet wines from Malvasia and Muscat grapes (*Vitis vinifera* L.) grown in Sardinia. *South African J. Enol. Vitic.* **2012**, *33*, 115–121, doi:10.21548/33-1-1313.

8. Mayén, M.; Zea, L.; Mérida, J.; Moyano, L.; Toledano, A.; Medina, M. Compuestos fenólicos y del aroma diferenciadores de vinos generosos tipo fino y oloroso - Dialnet. *Rev. Enólogos*, **2005**, 36, 30–33.
9. Sánchez-gómez, R.; Zalacain, A.; Pardo, F.; Alonso, G.L.; Salinas, M.R. Moscatel vine-shoot extracts as a grapevine biostimulant to enhance wine quality. *Food Res. Int.* **2017**, 98, 40–49, doi:10.1016/j.foodres.2017.01.004.
10. Guth, H. Quantitation and Sensory Studies of Character Impact Odorants of Different White Wine Varieties. *J. Agric. Food Chem.* **1997**, 45, 3027–3032, doi:10.1021/jf970280a.
11. Peinado, R.A.; Moreno, J.; Bueno, J.E.; Moreno, J.A.; Mauricio, J.C. Comparative study of aromatic compounds in two young white wines subjected to pre-fermentative cryomaceration. *Food Chem.* **2004**, 84, 585–590, doi:10.1016/S0308-8146(03)00282-6.
